# Supplementary material for: Mesenchymal Stem Cells Enhance Liver Regeneration via Improving Lipid Accumulation and Hippo Signaling
Source: Hindawi journal article supplement (doi:10.1155/2018/7652359), 2018-01-01
Supplement: f1 [file 7652359.f1.pdf]

**Table S1. Sequence of primers used in experiments**

| Gene                           | Forward sequence       | Reverse sequence              |
|--------------------------------|------------------------|-------------------------------|
| <i>GAPDH</i>                   | TCAACGGCACAGTCAAG      | TACTCAGCACCAGCATCA            |
| <i>CCNA</i>                    | ATCTGACCGTTCCAACCA     | GGCAAGGCACAATCTCAT            |
| <i>CCNB</i>                    | CTTACACCAAGCACCAGAT    | GTCCATTCACCGTTGTCA            |
| <i>CCND</i>                    | ACTTCCTCTCCTGCTACC     | GCTTCTTCCTCCACTTCC            |
| <i>CCNE</i>                    | CTGGATGTTGGCTGCTTA     | CACTGATAACCTGAGACCTT          |
| <i>IL-6</i>                    | CAGAGTCATTCAGAGCAATAC  | GATGGTCTTGGTCCTTAGC           |
| <i>TNF-<math>\alpha</math></i> | TGTTTCATCCGTTCTCTACC   | CCACTACTTCAGCGTCTC            |
| <i>IL-1<math>\beta</math></i>  | CAGAACATAAGCCAACAAGT   | ACACAGGACAGGTATAGATTC         |
| <i>HGF</i>                     | TCATTGGTAAAGGAGGCA     | GTCACAGACTTCGTAGCGTA          |
| <i>IL-10</i>                   | AGCCAGACCCACATGCTCCGA  | ACAGGGGAGAAATCGATGACA<br>GCGT |
| <i>Areg</i>                    | GCGGAACCAATGAGAACT     | TGAGTCGTCCACAATATAGC          |
| <i>Birc5</i>                   | ACAGGAGACCGTGACATT     | CATCAGAAGGACAGAAGAAGA         |
| <i>Cyr61</i>                   | CGAAGATGGCGAGATGTT     | GATGAGCAAGGCACTGTT            |
| <i>Ctgf</i>                    | CTATGATGCGAGCCAACT     | CGGTAGGTCTTCACACTG            |
| <i>Foxm1</i>                   | TTGAGGTAGAGGCAGGAG     | GATAGAGGTGGTAATGAGACA         |
| <i>ACC</i>                     | GGACAACACCTGTGTGGTAGAA | CGTGGGGATGTTCCCTCT            |
| <i>DGAT1</i>                   | TGCTCTGGCATCATACTCCA   | TACAGTGTCTGGGCAGCAG           |
| <i>SCD1</i>                    | TCCCCTCCTCCAAGGTCTAC   | GCTCCACAAGCGATGAGC            |
| <i>SREBP1c</i>                 | GCTACCGTTCCTCTATCAAT   | GTTGCTGTGCTGTAAGAAG           |
| <i>PPAR<math>\gamma</math></i> | TTGAATGACCAAGTGA CTCT  | CGTGCTCTGTGACAATCT            |
| <i>CEBP<math>\alpha</math></i> | GCTCCTCCATCTACATTCC    | ACCACTTGCTTAACCACAT           |
| <i>FASN</i>                    | GGCTTGGTGA ACTGTCTC    | GGCTTGTCTGCTCTAAC             |
| <i>apoB</i>                    | ACAACATACGACAGCAAGA    | AGGTGGAAGTGACAGACA            |
| <i>ACSL1</i>                   | TGGGCACAGAAGAGAGGATT   | ATGGCTTCAAACCAGCATTC          |
| <i>CD36</i>                    | AATGAGACTGGGACCATCG    | CTCCAACACCAAGTAAGACCA         |

---

|               |                         |                       |
|---------------|-------------------------|-----------------------|
| <i>Fabp1</i>  | AAATCGTGCATGAAGGGAAG    | GTCTCCAGTTGGCACTCCTC  |
| <i>Fatp2</i>  | AGTACATCGGTGAACTGCTTCGG | CAATGTTGCCTTCAGTGGAAG |
|               | T                       | CGT                   |
| <i>PPARα</i>  | GAAGCCTACCTGAAGAACTT    | GAGGACAGCATCGTGAAG    |
| <i>ACO1</i>   | CTCACTCGAAGCCAGCGTTA    | TTGAGGCCAACAGGTTCCAC  |
| <i>CPT1</i>   | CGGTTCAAGAATGGCATCATC   | TCACACCCACCACCACGAT   |
| <i>LCAD</i>   | CCCTGGTTTTCAGCCTCCATT   | TCACTCCCAGACCTTTTGGC  |
| <i>SPT1</i>   | ACCTGGAGCGACTGCTAAAA    | ATCCCATAGTGCTCGGTGAC  |
| <i>Acadm</i>  | AGAGCAGGAAGGCATCAT      | CAGCAATAATCACAGGCATT  |
| <i>Acads</i>  | GTCTGTGGAACCTACCTGAG    | CTTCTTCACCTGCGATGT    |
| <i>Acadvl</i> | TCTCCTCTGATGCTTCCA      | CTCCTCCACCTTCTCAA     |

---
